# Supplementary material for: Technologies for Single-Cell Isolation
Source: Int J Mol Sci. 2015 Jul 24;16(8):16897–919. doi: 10.3390/ijms160816897 (PMC4581176; doi:10.3390/ijms160816897)
Supplement: Supplementary file 1 [file ijms-16-16897-s001.xls]

## Sheet: Complete results
179 results found in the Worldwide database for:
(txt = "single cell" and (txt = isolation OR txt = separation)) NOT (txt = fuel OR txt = solar) using Smart search
Displaying publications 1 - 179 as of 2015-04-20
Title	Publication number	Publication date	Inventor(s)	Applicant(s)	International classification	Cooperative Patent Classification	Application number	Date of application	Priority number(s)	Patents cited in the search report	Literature cited in the search report	Patents cited during examination	Literature cited during examination	Other patent citations	Other literature citations	Patents used in opposition	Literature used in opposition	Patents cited by the applicant	Literature cited by the applicant	International search citation	International search NPL citation	Supplementary international search citation	Supplementary international search NPL citation
Methods for multiplex analytical measurements in single cells of solid tissues	AU2013315409 (A1)	2015-04-02	FINSKI ALEXEI MACBEATH GAVIN	PRESIDENT AND FELLLOWS OF HARVARD COLLEGE	C12Q1/24 C12N5/00 C12Q1/04	G01N33/5091 G01N33/6803 G01N33/6848	AU20130315409	20130912	US201261700517P 20120913 US201261729127P 20121121 WO2013US59485 20130912
MONOCLONAL MESENCHYMAL STEM CELL GENERATION METHOD AND USE THEREOF	WO2014201986 (A1)	2014-12-24	ZHANG WENWEI [CN]	ZHANG WENWEI [CN]	C12N5/0775 A61K35/12 A61P3/10 A61P7/00 A61P25/00 A61P37/00	A61K35/28	WO2014CN79970	20140616	CN20131253266 20130621											US7396680 (B2) CN102517251 (A) WO2004070040 (A1)
Single-cell isolation screen adapted with pipettor tip	CN104195036 (A)	2014-12-10	LIU DEHUA	CRYSTALGEN NINGBO BIOTECH LTD			CN20141398252	20140813	CN20141398252 20140813
Continuous controllable isolation type active equalizing charging module and charging system thereof	CN204012842 (U)	2014-12-10	LI HUIQI OUYANG JIAN	GUANGZHOU YIWE ELECTRIC VEHICLE CO LTD			CN20142425536U	20140730	CN20142425536U 20140730
OBTAINING INFORMATION FROM SINGLE CELLS WITHIN POPULATIONS USING DNA ORIGAMI NANOSTRUCTURES	WO2014200933 (A1)	2014-12-18	BLATTMAN JOSEPH [US] YAN HAO [US] SCHOETTLE LOUIS [US] WEI XIXI [US]	UNIV ARIZONA STATE [US] BLATTMAN JOSEPH [US] YAN HAO [US] SCHOETTLE LOUIS [US] WEI XIXI [US]	C12N15/87 B82Y5/00 C07H21/04	B82Y5/00 B82Y15/00 C12N15/87	WO2014US41581	20140609	US201361834270P 20130612											US2012251583 (A1) WO2012058638 (A2) US2010047924 (A1) US2010113300 (A1) WO2006124089 (A1) WO2013184754 (A2) WO2013119676 (A1)
AN INTEGRATED MICROFLUIDIC DEVICE FOR SINGLE-CELL ISOLATION, CELL LYSIS AND NUCLEIC ACID EXTRACTION	CA2817775 (A1)	2014-11-29		YAO CHEN DONG [CA]	C12M1/34 C12M1/33 C12N15/10 C12Q1/68 C40B20/04 C40B30/00 C40B60/00	B01L3/502761 C12M47/04 C12M47/06 G01N15/1484 B01L2200/0652 G01N2015/149 C12Q1/68 C12N15/10	CA20132817775	20130529	CA20132817775 20130529
SYSTEM AND METHOD FOR CAPTURING AND ANALYZING CELLS	US2014349867 (A1)	2014-11-27	HANDIQUE KALYAN [US] GOGOI PRIYADARSHINI [US] ZHOU YI [US] JAVDANI SAEDEH SEPEHRI [US]	DENOVO SCIENCES INC [US]	G01N33/487 C12Q1/68	C12Q1/686 G01N33/48721 G01N33/574	US201414163153	20140124	US201414163153 20140124 US201361757141P 20130126 US201361757139P 20130126
Single-cell automatic analysis device based on dual-optical-path micro-fluidic chip	CN203929785 (U)	2014-11-05	LIU YU LI JINBO CHEN YIBING JIAN DANDAN GAO JIAN	UNIV QILU TECHNOLOGY			CN20142233342U	20140508	CN20142233342U 20140508
DEVICE AND METHOD FOR APPORTIONMENT AND MANIPULATION OF SAMPLE VOLUMES	US2014287423 (A1)	2014-09-25	NURSE JAMES [US]	LIFE TECHNOLOGIES CORPORATON [US]	C12Q1/68	B01L3/502707 B01L3/5088 B01L2300/0819 B01L2300/089 B01L2300/165 C12Q1/6806	US201214354878	20121025	US201214354878 20121025 US201161552741P 20111028 WO2012US61858 20121025
METHOD AND STRUCTURE FOR MULTI-CELL DEVICES WITHOUT PHYSICAL ISOLATION	WO2014144755 (A1)	2014-09-18	BROWN ERIC [US] WALSH ANDREW [US] BORREGO JOSE [US] GREIFF PAUL [US]	MTPV POWER CORP [US]	H01L31/0352	Y02E10/50 H01L31/05	WO2014US29296	20140314	US201361793328P 20130315											US4933021 (A) US4278473 (A) US4933022 (A) US5164019 (A) US7388147 (B2)
Method for in-vitro separation and culture of rat brain microvessel endothelial cells	CN104031879 (A)	2014-09-10	DONG HONG HU GE ZHANG TAO JIANG DAIXUN DUAN HUIQIN MU XIANG ZHANG QIAN FENG BO WANG XIN	UNIV BEIJING AGRICULT	C12N5/071		CN20141214962	20140521	CN20141214962 20140521
Microfluidic devices and methods for cell sorting, cell culture and cells based diagnostics and therapeutics	US2014248621 (A1)	2014-09-04	COLLINS JOHN [US]	COLLINS JOHN [US]	C12Q1/68	B01L3/502753 B01L3/502761 G01N15/1031 G01N15/1056 B01L7/52 B01L2200/0652 B01L2200/0668 B01L2200/0673 B01L2300/0832 B01L2300/0861 B01L2300/0864 B01L2300/1822 B01L2400/086	US201313738968	20130110	US201313738968 20130110 US201261585181P 20120110
HIGH-THROUGHPUT SINGLE-CELL IMAGING, SORTING, AND ISOLATION	US8934700 (B2); US2014247971 (A1)	2014-09-04	BHARADWAJ RAJIV [US] FATHOLLAHI BAHRAM [US]	BHARADWAJ RAJIV [US] FATHOLLAHI BAHRAM [US] CALIPER LIFE SCIENCES INC [US]	G06T7/00	B01L3/502761 C12M47/04 B01L2200/0636 B01L2200/0652 B01L2200/0668 B01L2300/0816 B01L2300/0864 C12N5/0087 G06T7/0012	US201313783767	20130304	US201313783767 20130304	US2012202278 (A1) US2012100538 (A1) US8021614 (B2) US2012264134 (A1) US2014091014 (A1) US8021614 (B2) US2012100538 (A1) US2012202278 (A1) US2012264134 (A1) US2014091014 (A1)								US6540895 (B1) US2003175980 (A1) US2004168982 (A1) US2007026416 (A1) US2011030808 (A1) US2011081674 (A1) US2011084033 (A1) US2012135887 (A1) WO2013019491 (A1)
APPLICATION OF SINGLE CELL GENOME SEQUENCING IN PREIMPLANTATION GENETIC DIAGNOSIS	WO2014127749 (A1)	2014-08-28	XIE XIAOLIANG [US] QIAO JIE [CN] TANG FUCHOU [CN] YAN LIYING [CN] FAN WEI [CN] HOU YU [CN]	HARVARD COLLEGE [US] UNIV PEKING 3RD HOSPITAL [CN] UNIV BEIJING [CN]	C12Q1/68	C12Q1/68	WO2014CN72462	20140224	CN2013157440 20130222
Method for separation and purification, long-term passage cultivation, cryopreservation and recovery of sheep spermatogonia stem cells	CN104004708 (A)	2014-08-27	WU YINGJI LUO FENHUA ZHANG YAN LIU LINHONG SA CHULA	UNIV INNER MONGOLIA	C12N5/071 A01N1/02		CN20141265999	20140616	CN20141265999 20140616
Method for production of microalgal energy (biodiesel) raw material from Haematococcus sp.	CN103993046 (A)	2014-08-20	LIU JIANGUO SONG PINGPING LIU QIAN LONG YUANRU PANG TONG LIN WEI LI LING ZHANG ZHEN HE MEILIN	INST OCEANOLOGY CHINESE ACAD	C12P7/64 C12P23/00 C12R1/89	Y02E50/13	CN2013153534	20130219	CN2013153534 20130219
Single cell voltage acquisition circuit in blade electric vehicle battery management system	CN203759216 (U)	2014-08-06	YU MINGHAN ZHANG JUNHONG JIANG WEI SUN QUANQIANG GUO QIJIE	BEIJING ZHIXING HONGYUAN AUTOMOBILE TECHNOLOGY CO LTD	G01R31/36 G01R19/25		CN2014251883U	20140127	CN2014251883U 20140127
Preparation method for animal transgenic positive single-cell clone	CN103937746 (A)	2014-07-23	WU ZHENFANG HE XIAOYAN ZHANG XIANWEI LI ZICONG LIU DEWU SHI JUNSONG ZHOU RONG	GUANGDONG WENS FOODSTUFF GROUP CO LTD	C12N5/10 C12N5/073 C12N15/87		CN2014197949	20140318	CN2014197949 20140318
Automatic single cell analysis method based on microfluidic system	CN103926190 (A)	2014-07-16	LIU YU BAN QING GAO JIAN	UNIV QILU TECHNOLOGY	G01N15/14		CN20141192110	20140508	CN20141192110 20140508
Method for producing single-cell protein from water-chestnuts by virtue of fermentation	CN103881932 (A)	2014-06-25	BAIMING PAN LIXIANG SU	HEZHOU UNIVERSITY	C12N1/16 C12N1/14 C12R1/845		CN20131477392	20131001	CN20131477392 20131001
Separation and purification method for Salvia Miltiorrhiza protoplast	CN103834611 (A)	2014-06-04	DONG JUANE ZHU NAN YAO YAQIN LIU WENTING	UNIV NORTHWEST A&F	C12N5/04		CN2014146870	20140211	CN2014146870 20140211
SINGLE-CELL LABEL-FREE PHOTOACOUSTIC FLOWOXIGRAPHY IN VIVO	US2014142404 (A1)	2014-05-22	WANG LIHONG V [US] MASLOV KONSTANTIN [US] WANG LIDAI [US]	UNIV WASHINGTON [US]	A61B8/00 A61B5/00 A61B5/145	A61B8/4416 A61B5/0095 A61B5/14542 A61B2503/40 A61B2503/42	US201414164117	20140124	US201414164117 20140124 US201113125522 20110421 WO2009US61435 20091021 US20080107845P 20081023 US201361756092P 20130124
Method for isolating and subculturing primary cell of human embryo cortex neural stem cell	CN103789269 (A)	2014-05-14	LU HUA	LU HUA	C12N5/0797 C12N5/079 C12N5/0793		CN20121505244	20121130	CN20121505244 20121130
ISOLATION OF LUNG CANCER CELLS AND PROLIFERATION THEREOF USING SUSPENSION CULTURE METHOD	KR20140047343 (A)	2014-04-22	SEO MIN SEOK [KR] PARK SOON JUNG [KR] MOON SUNG HWAN [KR] CHUNG HYUNG MIN [KR]	CHABIO & DIOSTECH CO LTD [KR]	C12N5/09 C12Q1/24 C12Q1/25 G01N33/15		KR20120113492	20121012	KR20120113492 20121012
ISOLATION OF NON-EMBRYONIC STEM CELLS AND USES THEREOF	WO2014152321 (A1)	2014-09-25	XIAN WA [US]	JACKSON LAB [US]	C12N5/071 C12N5/0797 C12N5/095	C12N5/0623 C12N5/0672 C12N5/0676 C12N5/0679 C12N5/0685 C12N5/0695 C12N2500/38 C12N2501/11 C12N2501/15 C12N2501/155 C12N2501/33 C12N2501/415 C12N2501/42 C12N2533/52	WO2014US27207	20140314	US201361792027P 20130315 US201361912795P 20131206											WO2012168930 (A2) WO2012044992 (A2) WO2010090513 (A2) WO2012168434 (A1) WO03030959 (A1) WO2009156398 (A1) US2013039893 (A1) WO2007103282 (A2) WO2012014076 (A2) WO2008087257 (A1) US2012064047 (A1) WO2007047509 (A2) US2004161419 (A1)	XP009017102 XP023911057 XP028325676 XP021102310
Method for Judging charging/discharging state of vanadium battery in operation process	CN103645441 (A)	2014-03-19	LIU JIANGUO FENG XINGMEI ZHANG JIANGUO WANG SHAOLIANG LIU XIN YAN CHUANWEI CHEN HUI	INST METAL RES CHINESE ACAD SC	G01R31/36		CN20131637538	20131129	CN20131637538 20131129
Aorta three-dimensional culture single cell separator	CN203411544 (U)	2014-01-29	YAN FENG JIANG FAN	YAN FENG	C12M3/04		CN20132241787U	20130425	CN20132241787U 20130425
Co-culturing method of human primary hepatocytes and liver nonparenchymal cells	CN103509751 (B); CN103509751 (A)	2014-01-15	HU KANGHONG ZHOU MING CAO XIAOBEI	KANGLUO BIOTECHNOLOGY WUHAN CO LTD	C12N5/071		CN20131282851	20130708	CN20131282851 20130708
Novel floating charging circuit using silicon controlled rectifiers	CN203368054 (U)	2013-12-25	ZHAO ENHAI	ZHAO ENHAI	H02J7/00		CN20132230642U	20130502	CN20132230642U 20130502
EXPRESSION OF SECRETED AND CELL-SURFACE POLYPEPTIDES	WO2013177533 (A1)	2013-11-28	YU KENNETH [US] BALTIMORE DAVID [US] YANG LILI [US]	CALIFORNIA INST OF TECHN [US]	C12N15/11 C12N15/86	C12N15/85 C12N15/907 C07K2319/00 C12N2740/15043 C12N15/86 G01N33/582 G01N33/68	WO2013US42688	20130524	US201261652006P 20120525											US2005042721 (A1) EP1873251 (A1) EP1132479 (A1) US2006252096 (A1)
CAPILLARY ABSORPTION SPECTROMETER AND PROCESS FOR ISOTOPIC ANALYSIS OF SMALL SAMPLES	WO2014120316 (A1)	2014-08-07	ALEXANDER M LIZABETH [US] KELLY JAMES F [US] SAMS ROBERT L [US] MORAN JAMES J [US] NEWBURN MATTHEW K [US]	BATTELLE MEMORIAL INSTITUTE [US]	G01N21/31 G01J3/42 G01J3/433 G01N21/39 G01N33/00 G02B6/02	G01J3/4338 G02B6/4296 G01N21/3103 G01N21/39 G01N21/3504 G01N21/718 G02B6/02328 G01N2021/0346 G01N2021/052 G01N2021/3125 G01N2021/399 G01N2021/8578 G01N21/59	WO2013US69705	20131112	US201313757460 20130201											WO2012031208 (A2) WO2012018869 (A1) WO9942814 (A1) US5957858 (A) WO2007008932 (A2)	XP012161835
Pure entire foetal genome DNA isolation method	CN103382469 (A)	2013-11-06	CAI YONGPING PAN XINGHUA	SHANGHAI GREEN GLOBE BIOTECHNOLOGY CO LTD	C12N15/10	C12Q1/6806 C12N15/10	CN20131125020	20130411	CN20121135273 20120504 CN20131125020 20130411
SINGLE-CELL ISOLATION METHOD AND SINGLE-CELL CULTURE METHOD FOR BOTRYOCOCCUS BRAUNII	WO2013121509 (A1)	2013-08-22	OHAMA TAKESHI [JP] YAMASAKI TOMOHITO [JP] PARK HYUNSUN [JP] FANTAO KONG [JP] HOU LI YUAN [JP]	UNIV KOCHI TECHNOLOGY [JP] OHAMA TAKESHI [JP] YAMASAKI TOMOHITO [JP] PARK HYUNSUN [JP] FANTAO KONG [JP] HOU LI YUAN [JP]	C12N1/12	C12N1/12	WO2012JP53300	20120213	WO2012JP53300 20120213											WO2011003024 (A2) US2009325218 (A1) WO0202793 (A1) JP2002360114 (A) JPH03103170 (A)
Separation method of breast cancer stem cells	CN103243075 (A); CN103243075 (B)	2013-08-14	DENG TAO ZHAO XIJUAN WEI WEI WEI LIWAN GAO TIANQUAN	CHENGDU MEDGENE BIOTECHNOLOGY CO LTD	C12N5/095		CN20131195721	20130523	CN20131195721 20130523	CN102260647 (A) CN101050452 (A)
Multi-in-series high-voltage lithium battery pack equalizing device	CN203086174 (U)	2013-07-24	XIA BIN	APOWER ELECTRONICS CO LTD GUOGUANG ELECTRIC CO LTD	H02J7/00 H02H7/18		CN20122690672U	20121213	CN20122690672U 20121213
Single cell voltage isolation detection apparatus	CN203012008 (U)	2013-06-19	WANG FENGJIN	WANG FENGJIN ZHONGSHAN PURUNSI POWER SUPPLY EQUIPMENT TECHNOLOGY CO LTD	G01R19/25		CN20122694754U	20121214	CN20122694754U 20121214
Unicell separator	CN103160428 (A); CN103160428 (B)	2013-06-19	ZHANG WEIHUA	PERSONGEN BIOMEDICINE SUZHOU CO LTD	C12M1/00		CN2013173661	20130308	CN2013173661 20130308
Medical water auxiliary liposuction equipment	CN202982151 (U)	2013-06-12	LI JING HU WENGUANG	SHAOSHAN XIALONG MEDICAL EQUIPMENT MFG CO LTD	A61B17/3203 A61M1/00		CN20122638673U	20121128	CN20122638673U 20121128
Peanut breeding method of fast neutron irradiation combining with tissue culture	CN103125401 (A)	2013-06-05	WANG JINGSHAN LIU LUXIANG SUI JIONGMING QIAO LIXIAN ZHAO LINSHU GUO BAOTAI SUN SHIMENG ZHAO LILAN	UNIV QINGDAO AGRICULTURAL	A01H4/00		CN20131109878	20130329	CN20131109878 20130329
APPARATUS FOR SINGLE CELL SEPARATION AND POSITION FIXING	US2013129578 (A1); US8475730 (B2)	2013-05-23	JEONG OK CHAN [KR]	JEONG OK CHAN [KR] UNIV INJE IND ACAD COOPERATION [KR]	B03B7/00	B01L3/502761 C12M47/04 G01N15/1484 G01N2015/1081 B01L2300/0816 B01L2300/0874 B01L2300/0887 B01L2400/0433 B01L2400/0487 G01N2015/1006	US201113299766	20111118	WO2011KR08788 20111117	US2004037739 (A1) US2007243523 (A1) US2004037739 (A1) US2007243523 (A1)
Device for efficiently and comprehensively utilizing potato starch wastewater	CN202849381 (U)	2013-04-03	ZHANG CUIYING SUN JIAN	XUZHOU INST TECHNOLOGY	C12M1/00		CN20122519516U	20121011	CN20122519516U 20121011
Avidin-biotin system cell patterning-based chip and preparation and applications thereof	CN103013821 (B); CN103013821 (A)	2013-04-03	REN DAHAI YOU ZHENG XIA YIQIU WANG JUN XIE JINYU	UNIV TSINGHUA	C12M1/34 C40B40/02 C40B50/06		CN20121511033	20121203	CN20121511033 20121203	CN101046448 (A) CN102174387 (A) CN1734265 (A) CN102226168 (A) CN101955595 (A) CN102053160 (A)
Maintenance free storage battery provided with power socket	CN202839880 (U)	2013-03-27	ZHANG LINGJIE	ZHANG LINGJIE	H01M10/42 H01M2/12 H01M2/24		CN20122399626U	20120808	CN20122399626U 20120808
ISOLATION OF MICROBIAL OILS	EA006979 (B1)	2006-06-30	BIJL HENDRIK LOUIS [NL] SCHAAP ALBERT [NL]	DSM I P ESSETS B V [NL]	C12M1/00 C12P7/64 A23D9/00 B01D17/038 C07G17/00 C11B1/00 C11B1/02 C11B1/06	C12P7/6463 A23D9/00 C11B1/00 C11B1/025 C11B1/06 C12P7/6472	EA20030000212	20010801	EP20000306601 20000802 WO2001EP08903 20010801
Medical water-assisted liposuction equipment	CN102935002 (B); CN102935002 (A)	2013-02-20	LI JING HU WENGUANG	SHAOSHAN XIALONG MEDICAL APPLIANCE MFG CO LTD	A61B17/00 A61M1/00		CN20121493136	20121128	CN20121493136 20121128
Separation and purification method of multi-organ derived adult NG2 (Nerve/Glial 2) positive stem cell population	CN102899291 (A)	2013-01-30	BAI LIANHUA SHUAI LING LAI JIEJUAN ZENG LINLI ZHANG YUJUN LI YAOCHEN ZHANG HONGYU BIE PING	UNIV PLA 3RD MILITARY MEDICAL	C12N5/0797		CN20121426637	20121031	CN20121426637 20121031
On-line monitoring recording device of single cell voltage of power battery pack	CN202693672 (U)	2013-01-23	LI JINLU FAN JINRONG	HARBIN ZEEMOO TECHNOLOGY CO LTD	G01R19/25		CN20122299333U	20120626	CN20122299333U 20120626
METHOD AND APPARATUS FOR SINGLE CELL ISOLATION AND ANALYSIS	US2012315639 (A1)	2012-12-13	DENG GLENN YAGUANG [US] ZHANG JIE [US] TIAN FANG [US]	DENG GLENN YAGUANG [US] ZHANG JIE [US] TIAN FANG [US]	G01N33/574 C12M1/42 C12Q1/68 G01N33/566	G01N33/538 G01N33/54333	US201213483422	20120530	US201213483422 20120530 US201161494478P 20110608	US8071395 (B2) US7537907 (B2)
Preparation method for monoclonal antibody	CN102776200 (A)	2012-11-14	CHANGJUN SHAO JING GAO XUMIN WANG JIE FENG YU JUN	BEIJING INST OF GENOMICS CHINESE ACADEMY OF SCIENCES ZHOUSHAN TONGSHENG BIOLOG TECHNOLOGY CO LTD	C12N15/13 C07K16/00 C12N15/11 C12N15/63		CN20111119289	20110510	CN20111119289 20110510
SYSTEM AND METHOD OF CO-CULTIVATING MICROALGAE WITH FUNGUS	WO2012150968 (A1)	2012-11-08	YUAN JOSHUA SHUHUA [US] XIE SHANGXIAN [US]	RENEWUEL LLC [US] YUAN JOSHUA SHUHUA [US] XIE SHANGXIAN [US]	C12P39/00 A01H13/00 C12N1/12 C12P1/02	C12P39/00 C12N1/12 C12N1/14 C12P7/6463	WO2012US20665	20120109	US201161481721P 20110502											US2010112649 (A1) US2010279354 (A1) US2010236137 (A1) US4391887 (A)
Electrolyzer, useful for producing hydrogen and oxygen from electrochemical decomposition of water, comprises a single cell comprising cell components, inner electrode and outer electrode, or several single cells connected in series	DE102011002104 (A1)	2012-10-18		KUMATEC SONDERMASCHB & KUNSTSTOFFVERARBEITUNG GMBH [DE]	C25B9/08 C25B1/02	C25B11/03 C25B1/10 C25B9/08 Y02E60/366	DE20111002104	20110415	DE20111002104 20110415	DE2629506 (A1) DE202007005963U (U1) US6210643 (B1)								WO2004076721 (A2)
FLOATING MAGNET PROBE FOR CELL ISOLATION	US2012252088 (A1)	2012-10-04	ZHANG JIE [US] DENG GLENN Y [US] TIEN FANG [US]	ZHANG JIE [US] DENG GLENN Y [US] TIEN FANG [US]	C12M1/42 C12N13/00	C12M47/04 C12N1/02 C12N13/00	US201113296817	20111115	US201113296817 20111115 US201161468668P 20110329	US2006269385 (A1) US2009225979 (A1) US2009081688 (A1)
Vehicle high-power DC/DC driving power supply and driving method	CN102624236 (A)	2012-08-01	GUANHAO CHEN	GUANHAO CHEN	H02M3/335 H02H7/10 H02M3/337	B60L3/003 B60L11/1862 B60L15/08 H02M1/32 Y02T10/7044 Y02T10/7005 Y02T10/705 B60L2240/525 B60L2240/529 B60L2240/527	CN2011128816	20110126	CN2011128816 20110126
High-low density method for separation and culture of human elder neural stem cells	CN102559596 (A)	2012-07-11	WEIJIANG WU	WEIJIANG WU	C12N5/0797 C12N5/02 C12N5/0735		CN20111447605	20111227	CN20111447605 20111227
Isolation and cultivation method of primary cells of human embryonic cortex neural stem cells	CN102533639 (A)	2012-07-04	HUA LU	HUA LU	C12N5/0735 C12N5/0797		CN20111448000	20111227	CN20111448000 20111227
Separate culture method for neural stem cell of cortex of human embryo	CN102533636 (A)	2012-07-04	HUA LU	HUA LU	C12N5/0735 C12N5/0797		CN20111447873	20111227	CN20111447873 20111227
BATTERY PACK AND ELECTRICALLY POWERED VEHICLE PROVIDED WITH THE SAME	KR20120030014 (A)	2012-03-27	YOSHIOKA TOSHIKI [JP] KUSUNOKI TOSHIKI [JP]	LITHIUM ENERGY JAPAN [JP]	H01M2/10 B60K1/04 B62D25/20	B60K1/04 H01M2/1072 H01M2/1077 H01M2/1083 B60K2001/005 B60K2001/0438	KR20110092861	20110915	JP20100207962 20100916
In-vitro separation culture and differentiation method for human fetal midbrain nerve stem cells	CN102443570 (A)	2012-05-09	HUA LU	HUA LU	C12N5/0797 C12N5/0793		CN20111447902	20111227	CN20111447902 20111227
Tubular multi-pore micron motor and preparation method and application thereof	CN102431966 (A); CN102431966 (B)	2012-05-02	JINXING LI ZHAOQIAN LIU GAOSHAN HUANG YONGFENG MEI RAN LIU	UNIV FUDAN	B81C1/00 B81B7/00		CN20111443627	20111227	CN20111443627 20111227
ISOLATION OF MICROBIAL OILS	MY135350 (A)	2008-03-31	LOUIS BIJL HENDRIK [NL] ALBERT SCHAAP [NL]	DSM IP ASSETS BV [NL]			MY2003PI00406	20030206	MY2003PI00406 20030206
METHOD FOR STAINING KARYOCYTES AND USE THEREOF	WO2012034541 (A1)	2012-03-22	LI CAIXIA [CN] HU LAN [CN]	INST OF FORENSIC SCIENCE OF MINISTRY OF PUBLIC SECURITY [CN] LI CAIXIA [CN] HU LAN [CN]	G01N1/30 C12Q1/68	C12Q1/6841 G01N33/569 G01N1/30 C12Q1/6841 C12Q2543/101	WO2011CN79824	20110919	CN20101288213 20100919											CN101948901 (A)
Apparatus for Magnetic Separation of Cells	US2012045828 (A1)	2012-02-23	DAVIS RONALD W [US] JEFFREY STEFANIE S [US] MINDRINOS MICHAEL N [US] PEASE R FABIAN [US] POWELL ASHLEY ANN [US] HAJHOSSEIN TALASAZ AMIRALI [US]	DAVIS RONALD W [US] JEFFREY STEFANIE S [US] MINDRINOS MICHAEL N [US] PEASE R FABIAN [US] POWELL ASHLEY ANN [US] HAJHOSSEIN TALASAZ AMIRALI [US] UNIV LELAND STANFORD JUNIOR [US]	C12N5/09 C12M3/00	B03C1/01 B03C1/286 G01N33/54333 B03C2201/18 B03C2201/26	US201113284482	20111028	US201113284482 20111028 US20080333213 20081211 US20070013238P 20071212	US2006266130 (A1) US2002172987 (A1) US2006207944 (A1) US2007251885 (A1)
IN VITRO METHODS FOR THE INDUCTION AND MAINTENANCE OF PLANT CELL LINES AS SINGLE SUSPENSION CELLS WITH INTACT CELL WALLS, AND TRANSFORMATION THEREOF	US2012034697 (A1); US8206983 (B2)	2012-02-09	JAYAKUMAR P SAMUEL [US] BERINGER JEFFREY [US] SCHMITZER PAUL R [US] BURROUGHS FRANK [US] GARISSON ROBBI J [US] AINLEY WILLIAM M [US] SAMBOJU NARASIMHA C [US]	JAYAKUMAR P SAMUEL [US] BERINGER JEFFREY [US] SCHMITZER PAUL R [US] BURROUGHS FRANK [US] GARISSON ROBBI J [US] AINLEY WILLIAM M [US] SAMBOJU NARASIMHA C [US] DOW AGROSCIENCES LLC [US]	C12N5/04	C12N5/0025 C12N5/04 C12N15/8201	US201113206637	20110810	US201113206637 20110810 US20070965543 20071227 US20060878028P 20061229	US4533636 (A)
Algal protein and method for preparing the same	TW201127962 (A)	2011-08-16	YANG WEN-JEN [TW] JENG JIUNN-MING [TW]	TAIWAN AL GAL SCIENCE INC [TW]	C12P21/06		TW20100103678	20100206	TW20100103678 20100206
A scheduling method for relay-assisted wireless communication systems and system thereof	TWI326537 (B); TW200818942 (A)	2008-04-16	LIN SHIANG-JIUN [TW] FU I-KANG [TW] PAI CHENG-KANG [TW] SHEEN WEN-HO [TW]	IND TECH RES INST [TW]	H04B7/14 H04L29/08	H04B7/2606	TW20060137676	20061013	TW20060137676 20061013
Method and apparatus for the discretization and manipulation of sample volumes	CN102187216 (A)	2011-09-14	CHIU DANIEL T COHEN DAWN E JEFFRIES GAVIN D	UNIV WASHINGTON	G01N33/48 G01N35/00	B01L3/502784 B01L7/52 G01N35/08 G01N35/10 B01L2300/0883 B01L2300/165 B01L2300/1827 B01L2300/1861 B01L2400/0439 B01L2400/0633 G01N2035/00356 G01N2035/1032 G01N2035/1034	CN20098141619	20090730	WO2009US52299 20090730 US20080089367P 20080815
Microfluidic unicellular active oxygen automatic analyzer	CN102183504 (A); CN102183504 (B)	2011-09-14	QINGLING LI BO TANG ZHENZHEN CHEN XINYUAN ZHANG	UNIV SHANDONG NORMAL	G01N21/65		CN2011126164	20110125	CN2011126164 20110125	US2010086919 (A1) CN101923053 (A) CN1940550 (A)
PLATE FOR SEPARATING SINGLE CELL	JP2011152108 (A); JP5622189 (B2)	2011-08-11	MATSUTANI AKIHIRO TAKADA AYAKO	TOKYO INST TECH	C12M1/26 C12N1/02	C12M47/04	JP20100017287	20100128	JP20100017287 20100128	JP2008048735 (A) JP2006296427 (A)		JP2009106169 (A) JP2008519598 (A) JP2007298502 (A) WO2009048435 (A1) JP2008048735 (A) JP2006296427 (A) JP2004173681 (A)
PLANT-PROTEIN PRODUCT AND METHOD FOR PREPARING THE SAME	US2011218326 (A1)	2011-09-08	CHEN CHUH-HSIANG [TW] LU CHIH-YI [TW] CHEN FA-TZU [TW]	ZEN U BIOTECHNOLOGY CO LTD [TW]	C07K14/435 C07K1/14	C07K1/14 C07K14/435	US20100716376	20100303	US20100716376 20100303	US3991215 (A) US5610277 (A) US2007116699 (A1) US2008102167 (A1) US2010093054 (A1) US2010113368 (A1) JP2004203801 (A) WO2006109991 (A1) WO2008096044 (A1)
High-temperature pile for thermal battery	CN102148338 (A)	2011-08-10	HUARONG HU JUNLI GAO PING ZHOU LIUYAN JI	SHANGHAI INST SPACE POWER SOURCES	H01M2/02 H01M6/42		CN20101108613	20100210	CN20101108613 20100210
ARRAY APPARATUS FOR SEPARATION OF SINGLE CELL	KR20110037345 (A); KR101252829 (B1)	2011-04-13	PARK JEONG WON [KR] JUNG MOON YOUN [KR] PARK SEON HEE [KR]	KOREA ELECTRONICS TELECOMM [KR]	C12M3/00 C12M3/08	B01L3/502761 C12M23/16 C12M47/06 B01L2200/0652 B01L2200/0668 B01L2300/0864 B01L2400/0487 B01L2400/086	KR20090094748	20091006	KR20090094748 20091006	KR870001670B (B1) KR20050047540 (A) KR20090007411 (A)
Cord blood mesenchyme stem cell as well as preparation method and application thereof	CN102002479 (A)	2011-04-06	GUANGPENG LIU YULIN LI JIAN SUN WENJIE ZHANG LEI CUI YILIN CAO	SHANGHAI GUORUI LIFE SCIENCE CO LTD	A61L27/38 A61L27/58		CN20091194915	20090901	CN20091194915 20090901
Sentinel lymph node rapid assay kit	CN101975860 (A); CN101975860 (B)	2011-02-16	JINGFANG JU BINFENG LU YAN JUN	JIANGYIN NUOGE BIOLOG TECHNOLOGY CO LTD	G01N33/577 G01N33/532		CN20101512724	20101020	CN20101512724 20101020
Method for producing single cell proteins and L-arabinose by corn bran	CN101974431 (A)	2011-02-16	LIPING DU DONGGUANG XIAO WEIDONG GAI XUEWU GUO CUIYING ZHANG YEFU CHEN	UNIV TIANJIN SCIENCE & TECH	C12N1/00 C12P19/02 C12R1/74		CN20101299111	20101008	CN20101299111 20101008	CN1966665 (A)
Heat balance control method for aluminum electrolysis cell in low-voltage operation	CN101962785 (B); CN101962785 (A)	2011-02-02	HAITAO YUE JIGUO ZHANG JIAN ZHAO JIANFENG LI	HENAN ZHONGFU IND CO LTD	C25C3/20		CN20101516130	20101022	CN20101516130 20101022	CN101260542 (A) CN101423963 (A) CN101275247 (A)
Method for rapid induction of homogenous polyploids of Chinese jujube	CN101926283 (A)	2010-12-29	MENGJUN LIU NA WANG	UNIV HEBEI AGRICULTURE	A01H1/08 A01H4/00		CN20091227922	20091203	CN20091227922 20091203
Device and method for continuously analyzing single-cell contents by miniflow control chip at high speed	CN101923053 (A); CN101923053 (B)	2010-12-22	XUEFENG YIN CHUNXIU XU JINHUA LIU	UNIV HANGZHOU NORMAL	G01N21/64 C12Q1/02		CN20101230276	20100719	CN20101230276 20100719	WO0222787 (A2) US7115230 (B2) CN101393124 (A)
Complete set of equipment for single cell gel electrophoresis test	CN201662556 (U)	2010-12-01	CHAOFENG SHEN CONGKAI ZHANG LEI CHEN YUECHUN ZENG JIYAN SHI YINGXU CHEN	UNIV ZHEJIANG	G01N27/447		CN20102126325U	20100309	CN20102126325U 20100309
Method for separating and culturing macaque adult hepatic precursor cells	CN101864394 (A)	2010-10-20	SHAOHUI JI WEIZHI JI LIFANG JIN	KUNMING YALING BIOLOG TECHNOLOGY CO LTD	C12N5/071		CN20101198776	20100612	CN20101198776 20100612
Membrane bioreactor for denitrification and waste water denitrification method	CN101863586 (B); CN101863586 (A)	2010-10-20	ZUNYU CHEN SHIYU LI FANGANG MENG ZHONGBO ZHOU	UNIV SUN YAT SEN	C02F9/14		CN20101191422	20100528	CN20101191422 20100528	CN101289254 (A) JP2008229415 (A) JPH0683828B (B2) CN2410293Y (Y) CN201338967Y (Y) CN201330200Y (Y) CN101279794 (A)
Method for extracting ribonucleic acid and cell wall polysaccharides in single cell protein by using one-step method	CN101830998 (B); CN101830998 (A)	2010-09-15	JILONG DU FENGBO LI WEIDONG WU ZHANG JUN	HUANGSHAN YINGKESONG BIOTECHNOLOGY CO LTD	C08B37/00 C07H1/08 C07H21/02		CN20101168980	20100512	CN20101168980 20100512
VESSEL FOR CENTRIFUGAL SEPARATION	JP2010142750 (A)	2010-07-01	MASUDA YOSHIKO	OLYMPUS CORP	B04B11/04 B04B5/02 C12M1/10	C12M33/10 C12M45/05 C12M47/04	JP20080323958	20081219	JP20080323958 20081219
Method for carrying out streaming counting sort by utilizing micro light pattern	CN101745438 (A); CN101745438 (B)	2010-06-23	YAN CHANG ZHONGHUA NI HONG YI XIAOLU ZHU	UNIV SOUTHEAST	B01L3/00 G01N1/14		CN2010118216	20100119	CN2010118216 20100119
Method for separating and purifying oligodendrocyte precursor cells	CN101735983 (A); CN101735983 (B)	2010-06-16	JIANQIN NIU LAN XIAO	UNIV PLA 3RD MILITARY MEDICAL	C12N5/079		CN20091251053	20091229	CN20091251053 20091229
Preparation method of single cell protein feed by taking acetone butanol fermentation wastewater as raw materials	CN101731450 (B); CN101731450 (A)	2010-06-16	BO TANG ZHENJING WANG ZHIMING WEN	JIANGSU LIANHAI BIOLOG TECHNOL	A23K1/00 C02F3/34		CN20091264354	20091221	CN20091264354 20091221
Novel highly efficient method for preparing mice pancreatic single cell suspension	CN101705206 (A); CN101705206 (B)	2010-05-12	DAN LI CHUNBO TENG	UNIV NORTHEAST FORESTRY DAN LI CHUNBO TENG	C12N5/071		CN2009173257	20091125	CN2009173257 20091125
Valve-control maintenance-free dry-charged lead-acid storage battery capable of being side laid to use	CN201397853 (Y)	2010-02-03	GANG CHEN	ZHEJIANG HAIJIU BATTERY CO LTD	H01M10/06 H01M2/02 H01M2/12	Y02E60/126	CN20082171338U	20081222	CN20082171338U 20081222
Expression vectors	US2009320149 (A1); US8969539 (B2)	2009-12-24	TSURUSHITA NAOYA [US] TSO J YUN [US]	JN BIOSCIENCES LLC [US]	A01K67/027 C07K16/00 C12N5/06 C12N15/00 C12N15/11	C07K16/00 C07K16/241 C07K16/2866 C12N15/85 A01K2217/072 A01K2227/105 A01K2267/01 C07K2319/03 C07K2319/035 C07K2319/30 C07K2319/32 C12N2840/44 C12N2840/85	US20090456007	20090610	US20090456007 20090610 US20080131657P 20080611	US2006015958 (A1) US2006015958 (A1)								US2002137022 (A1) US2009136950 (A1)
SCHEDULING METHODS AND SYSTEMS FOR MULTI-HOP RELAY IN WIRELESS COMMUNICATIONS	US8340591 (B2); US2009286465 (A1)	2009-11-19	LIN SHIANG-JIUN [TW] FU I-KANG [TW] PAI CHENG-KANG [TW] SHEEN WERN-HO [TW]	IND TECH RES INST	H04B7/14 H04H20/71 H04L12/26	H04B7/15507 H04B7/2606	US20080205989	20080908	US20080205989 20080908 US20080121749 20080515	US2009003260 (A1) US2009003260 (A1)								JP2007258844 (A) JP2007306572 (A) JP2008092580 (A) JP2008118660 (A) WO03058984 (A2)
METHOD OF MANUFACTURING A SEMICONDUCTOR DEVICE	KR20090089508 (A)	2009-08-24	AHN MYUNG KYU [KR]	HYNIX SEMICONDUCTOR INC [KR]	H01L21/8247		KR20080014718	20080219	KR20080014718 20080219
Method for using umbilical stalk placenta to prepare mesenchyma stem cell	CN101492654 (A); CN101492654 (B)	2009-07-29	HENGXING MENG [CN] CHUAN SHI [CN] JUNLING HAN [CN] JIAXUE HUANG [CN]	UNION STEM CELL & GENE ENGINEE [CN]	C12N5/08		CN20081102035	20080317	CN20081102035 20080317
Method for analysis of multiple regions of DNA in single cells of uncultured microorganisms	US2009186778 (A1)	2009-07-23	STEPANAUSKAS RAMUNAS [US] SIERACKI MICHAEL [US]		C40B40/06 C12Q1/68 C12Q1/70 C40B50/00	C12N15/1093 C12Q1/6809	US20080009582	20080118	US20080009582 20080118
Single Cell Analysis of Membrane Molecules	US2009173631 (A1)	2009-07-09	BOONE TRAVIS [US] SINGH SHARAT [US]		G01N27/447 G01N33/50	G01N33/5005	US20060462991	20060807	US20060462991 20060807 US20030702879 20031105 US20020425129P 20021108	US2011201009 (A1)
Method for preparing hydrolyzed oligosaccharides and short peptides from salt algae residues	CN101445819 (A)	2009-06-03	SHUNAN WEI [CN] XIAOHUA ZHOU [CN] TING JIN [CN] MIAOFEI LIAO [CN] XIALI SU [CN] LIN CHEN [CN] CHENGXIA ZHAO [CN]	UNIV CHONGQING [CN]	C12P19/14		CN20081237196	20081222	CN20081237196 20081222
METHOD FOR ACCESSING, WITHOUT COLLISION, DISTRIBUTED WIRELESS AD HOC LOCAL NETWORKS	WO2009104943 (A1)	2009-08-27	EL MESBAHI JELLOUL [MA] ERRAMI AHMED [MA] KHALDOUN MOHAMMED [MA] BOUATTANE OMAR [MA] EL YAAGOUBI EL HASSANE [MA]	EL MESBAHI JELLOUL [MA] ERRAMI AHMED [MA] KHALDOUN MOHAMMED [MA] BOUATTANE OMAR [MA] EL YAAGOUBI EL HASSANE [MA]	H04W84/18	H04W74/08 H04W28/04 H04W74/0808 H04W84/18	WO2009MA00003	20090219	MA20080030660 20080219											WO2007123383 (A1) US2005014467 (A1) WO03007552 (A2) WO02093831 (A2) US2003220113 (A1)
Single-cell inclusion analytical method based on micro-fluidic chip	CN101393124 (A)	2009-03-25	BINGCHENG LIN [CN] LINFEN YU [CN] DAPENG WU [CN] JIANHUA QIN [CN]	GUANGZHOU INST OF CHEMISTRY PH [CN]	G01N21/64 G01N1/34 G01N33/48		CN2007112879	20070919	CN2007112879 20070919
Cross breeding method of Ganoderma lucidum	CN101352144 (B); CN101352144 (A)	2009-01-28	BAOGUI XIE [CN] JUNHUA LIN [CN] YOUJIN DENG [CN]	UNIV FUJIAN AGRIC & FORESTRY [CN]	A01H1/02 A01H4/00 C12N1/14 C12R1/645		CN2008171773	20080916	CN2008171773 20080916
New catalystic reactor method for producing commercial grade pulp, native lignin and single cell protein	CN101326326 (A)	2008-12-17		FLYNN KELLY ANTHONY O [CA]	D21C3/16 D21C3/26 D21C9/18 D21C11/10	D21C1/04 D21C3/02 D21C11/0007	CN2005852228	20051207	WO2005CA01862 20051207
Microflow cell culture array and application thereof	CN101275114 (A)	2008-10-01	CHUNXIONG LUO [CN] QI OUYANG [CN]	UNIV BEIJING [CN]	C12M1/00 C12N1/14 C12N1/16 C12N1/20 C12P1/02		CN20081104603	20080422	CN20081104603 20080422
NANOARRAYS OF SINGLE VIRUS PARTICLES, METHODS AND INSTRUMENTS FOR THE FABRICATION AND USE THEREOF	WO2008020851 (A2); WO2008020851 (A3)	2008-02-21	MIRKIN CHAD A [US] VEGA RAFAEL A [US] MASPOCH DANIEL [US] SALAITA KHALID [US]	UNIV NORTHWESTERN [US] MIRKIN CHAD A [US] VEGA RAFAEL A [US] MASPOCH DANIEL [US] SALAITA KHALID [US]	G01N33/50	A61K31/70 B82Y5/00 B82Y30/00 C12N7/00 G01N33/56983 C12N2770/00011 Y10S977/802	WO2006US32316	20060818	US20050712432P 20050831									US2003068446 (A1)		US2003068446 (A1)	XP002404023 XP002470255 XP002470256 XP002470257
ISOLATION, EXPANSION AND OF CLONOGENIC ENDOTHELIAL PROGENITOR CELLS	WO2005078073 (A3); WO2005078073 (A2)	2005-08-25	YODER MERVIN C [US] INGRAM DAVID A [US]	UNIV INDIANA RES & TECH CORP [US] YODER MERVIN C [US] INGRAM DAVID A [US]	C12N5/074 C12N5/0789 A61K35/12 C12N5/08 A61K35/14 A61K35/28 A61K35/44	C12N5/0692 C12N5/0647 A61K2035/124 C12N2501/125 C12N2501/145 C12N2501/22 C12N2501/26 C12N2502/28 C12N2533/54 C12N2533/90	WO2005US04267	20050209	US20040573052P 20040521 US20040637095P 20041217 US20040543114P 20040209 US20040542949P 20040209											WO0036090 (A2) WO03038048 (A2)	XP002351436 XP002351437 XP002351438 XP002351439 XP002351440 XP001180169 XP003000840 XP002351441 XP002351442 XP002351443 XP002351444
Structure for detecting charging effects in device processing	US2003094609 (A1); US6703641 (B2)	2003-05-22	KANE TERENCE L [US] WANG YUN YU [US] CAMBRA MALCOLM P [US] TENNEY MICHAEL P [US]	IBM [US]	H01L21/66 H01L23/544 H01L27/12 H01L23/58	H01L22/34 H01L2924/0002 Y10S257/903 H01L2924/0002 H01L2924/00	US20010991507	20011116	US20010991507 20011116	US5684311 (A) US5698872 (A) US5898206 (A) US5930663 (A) US6037638 (A) US6160298 (A) US6194252 (B1) US6291835 (B1) US6376285 (B1) US6407425 (B1) US6445049 (B1) US2001023949 (A1) US2001045670 (A1) US2002034841 (A1) US2002089031 (A1)								US5315145 (A) US5332903 (A) US5753920 (A) US5861634 (A) US5869877 (A) US6028324 (A) US6078058 (A) JPS6469025 (A) JPH04278559 (A) JPH06349920 (A) JPH11238774 (A)
Isolation and use of solid tumor stem cells	US2002119565 (A1); US6984522 (B2)	2002-08-29	CLARKE MICHAEL F [US] MORRISON SEAN J [US] WICHA MAX S [US] AL-HAJJ MUHAMMAD [US]	UNIV MICHIGAN [US]	A01K67/027 A61K35/12 A61K39/00 A61K39/395 A61P35/00 C07K14/82 C12N5/095 C12N5/10 C12N15/09 C12Q1/02 C12Q1/68 G01N33/15 G01N33/50 G01N33/53 G01N33/543 G01N33/574 G01N37/00 G01N33/574 C12N5/08	A01K67/0271 C12N5/0695 G01N33/5011 G01N33/57492 A61K2039/505 A61K2039/5152 A61K2039/5158 C12N2501/42 C12N2503/00 C12N2503/02 A61K39/39558 C12Q1/6886 C07K14/705 C07K14/70585 C07K14/71 C07K16/28 C07K16/2863 C07K16/30	US20010920517	20010801	US20010920517 20010801 US20000222794P 20000803 US20000240317P 20001013	US4612282 (A) US6197523 (B1) US2003032184 (A1)								US4411990 (A) US5061620 (A) US5087570 (A) US5589376 (A) US5643741 (A) US5650317 (A) US5654183 (A) US5672499 (A) US5693482 (A) US5750376 (A) US5753506 (A) US5780300 (A) US5814511 (A) US5821108 (A) US5824489 (A) US5849553 (A) US5851832 (A) US5914108 (A) US5942225 (A) US5994617 (A) US6004528 (A) US6083904 (A) US6090922 (A) US6353150 (B1) US6379925 (B1) US6380362 (B1) WO9737004 (A1) WO9857621 (A1) WO…
Analytical system based on porous material for highly parallel single cell detection	US2008020453 (A1)	2008-01-24	EHBEN THOMAS [DE] ZILCH CHRISTIAN [DE]		C12M1/33 C12M1/34	B01L3/5025 B01L3/50851 B01L3/50857 C12M47/04 C12M47/06 B01L3/50853 B01L7/52 C12M47/12 B01L2200/0647 B01L2300/045 B01L2300/046 B01L2300/0819 B01L2300/1827	US20070878088	20070720	DE20061033875 20060721
Froth flotation method and apparatus	US4737272 (A)	1988-04-12	SZATKOWSKI MARIAN [US] FREYBERGER WILFRED L [US]	BAKER INT CORP [US]	B03D1/02 B03D1/14 B03D1/16 B03D1/24 B03D1/02 B03B13/00 B03D1/14	B03D1/02 B03D1/028 B03D1/1406 B03D1/1412 B03D1/1475 B03D1/16 B03D1/245 C02F1/24 C02F2101/32	US19860850806	19860411	US19860850806 19860411	US2088624 (A) US2713477 (A) US3339730 (A) US3491880 (A) US4133746 (A) US4490248 (A) US4592834 (A)
Ecological system and method	US4086161 (A)	1978-04-25	BURTON ROBERT EDWARD	BURTON ROBERT EDWARD	C02F3/06 C02F3/10 C02F3/32 C02C5/10	C02F3/32 C02F3/06 C02F3/10	US19760750121	19761213	US19760750121 19761213	US3118424 (A) US3155609 (A) US3192154 (A) US3577678 (A) US3635816 (A) US3835039 (A)
Non-volatile memory circuits and architecture	US5278785 (A)	1994-01-11	HAZANI EMANUEL [US]	HAZANI EMANUEL [US]	G11C11/56 G11C16/04 G11C16/08 G11C16/10 G11C29/50 H01L21/8247 H01L27/115 H01L29/423 H01L29/788 G11C11/34 G11C8/00	H01L27/11519 G11C11/5621 G11C11/5628 G11C11/5635 G11C11/5642 G11C16/0425 G11C16/08 G11C16/10 G11C29/50 G11C29/50004 H01L27/115 H01L27/11521 H01L29/42324 H01L29/42328 H01L29/7883 G11C16/04 G11C16/0491 G11C2029/0403 G11C2029/5002 G11C2211/5611 G11C2211/5621 G11C2211/5622 G11C2211/5645	US19910713995	19910612	US19880152702 19880205 US19890377311 19890710 US19910713995 19910612	US3934233 (A) US4156286 (A) US4247920 (A) US4314362 (A) US4368988 (A) US4571708 (A) US4627027 (A) US4651305 (A) US4811301 (A) US4845538 (A) US4849937 (A) US4890259 (A) US5016216 (A) JPS5755597 (A) JPS5792494 (A) JPH02238322 (A) JPH02238500 (A)
Single cell isolation apparatus and method of use	US6538810 (B1)	2003-03-25	KARANFILOV CHRISTOPHER I [US]	KARANFILOV CHRISTOPHER I	B01L3/00 G02B21/34 G02B21/26	B01L3/5085 G02B21/34 B01L2200/0647 B01L2300/0681 B01L2300/069 B01L2300/0829 B01L2300/0858 B01L2400/049	US20000696089	20001026	US20000696089 20001026	US5231877 (A) US5427975 (A) US6445109 (B2)
Host organism capture	US5750346 (A)	1998-05-12	BRIDGHAM JOHN A [US] BRANDIS JOHN [US] LEONG JOHN [US] HOEPRICH JR PAUL D [US] SLOAN CHARLES L [US] O'NEILL ROGER A [US] ANDRE CHARLES [US]	PERKIN ELMER CORP [US]	C12N15/10 C12N15/63 C12N15/70 C12P21/04 C40B40/02 C12Q1/68 G01N33/483 G01N33/53 C07N21/04	C40B40/02 C12N15/1037 C12N15/635 C12N15/70	US19960695834	19960807	US19960585552 19960111 US19950511846 19950807 US19960695834 19960807	US5416000 (A) US5512131 (A) WO9627132 (A1)
Method of production and recovery of protein from food wastes	US4018650 (A)	1977-04-19	BUSTA FRANCIS F SCHMIDT BRUCE E MCKAY LARRY L	UNIV MINNESOTA	A23J1/00 A23K1/00 C12N1/20 C12B1/00	A23J1/001 A23K1/007 C12N1/20 Y10S435/832 Y10S435/853 Y10S435/804 Y10S435/838 Y10S435/837	US19750618289	19751001	US19750618289 19751001	US3711392 (A)
Induced gas liquid coalescer and flotation separator	US5156745 (A)	1992-10-20	CAIRO JR JOHN A [US] YOUNG JOHN A [US]	CAIRO JR JOHN A [US] YOUNG JOHN A [US]	B01D17/02 B01D17/022 C02F1/24 B01D17/022	B01D17/0205 C02F1/24 Y10S210/05 B01D17/0205 B01D17/045	US19900613388	19901113	US19900613388 19901113 US19900521262 19900509	US1940762 (A) US2669440 (A) US3542675 (A) US3948767 (A) US3948768 (A) US3956128 (A) US4191651 (A) US4255262 (A) US4277347 (A) US4308136 (A) US4335001 (A) US4428841 (A) US4442000 (A) US4454047 (A) US4564457 (A) US4782789 (A) US4834872 (A) US4874528 (A) US4964733 (A) US4980070 (A) US4981582 (A) US4986903 (A) US5011597 (A)
Single cell gas flotation separator with filter media	US5591347 (A)	1997-01-07	CAIRO JR JOHN A [US] YOUNG JOHN A [US]	UNICEL INC [US]	B01D24/14 B01D36/00 B03D1/14 C02F1/24 C02F1/00 C02F9/00 C02F1/24	B01D36/00 B01D24/14 B03D1/028 B03D1/1431 B03D1/1456 B03D1/1475 C02F1/24 B03D1/1468 C02F1/001 B01D2201/208 B01D24/14 B01D24/386 B01D24/405 B01D24/4631 B01D24/4869 B01D24/4884	US19960604800	19960223	US19960604800 19960223 US19950451145 19950526	US3433359 (A) US3506125 (A) US3713543 (A) US3905890 (A) US3977970 (A) US4094783 (A) US4162972 (A) US4289628 (A) US4294697 (A) US4377485 (A) US4626345 (A) US4673494 (A) US4800025 (A) US4981582 (A) US5064531 (A) US5080780 (A) US5080802 (A) US5130029 (A) US5156745 (A) US5256299 (A) US5273624 (A) US5320750 (A) US5516434 (A) DE3412217 (A1) DE4335104 (A1) JPH01242187 (A) SU1381074 (A1) SU1430353 (A1) G…
Chlor alkali cells method and cell compression system	US5779874 (A)	1998-07-14	LEMKE CHRIS A [US]	LEMKE, CHRIS A	C25B9/08 C25B9/00	C25B9/08	US19960603987	19960220	US19960603987 19960220	US3702267 (A) US4013535 (A) US4029565 (A) US4201652 (A) US4219394 (A) US4391693 (A) US4441977 (A) US4493759 (A) US4555323 (A)
Multibyte random access mass storage/memory system	US5815482 (A)	1998-09-29	ROPE RONALD E [US] PULLAM MARTIN L [US]	SQUARED G INC T [US]	G06F3/06 G11B7/14 G11B17/04 G11B7/00 G11B7/0033 G11B7/007 G11B7/085 G11B7/09 G11B7/125 G11B7/135 G11B7/12	G11B7/1359 G06F3/0613 G06F3/0634 G06F3/0677 G11B7/128 G11B7/14 G11B17/0408 G11B7/0033 G11B7/007 G11B7/08505 G11B7/08547 G11B7/0908 G11B2007/0013	US19960589560	19960122	US19960589560 19960122 WO1998US20248 19980928	US3885094 (A) US3975630 (A) US4004081 (A) US4009492 (A) US4024513 (A) US4074085 (A) US4090031 (A) US4129384 (A) US4163600 (A) US4219704 (A) US4265213 (A) US4269917 (A) US4321700 (A) US4395372 (A) US4444470 (A) US4450553 (A) US4495609 (A) US4500777 (A) US4542288 (A) US4544835 (A) US4633445 (A) US4636893 (A) US4637679 (A) US4656346 (A) US4680456 (A) US4734794 (A) US4779149 (A) US4810868 (A) US48519…
Magnetic separation method	US4001197 (A)	1977-01-04	MITCHELL RALPH CHET ILAN	SALA MAGNETICS	A23J1/18 B03C1/00 C12N1/02 A23J1/18	A23J1/18 C12N1/02 Y10S530/823 Y10S530/824 Y10S530/825 Y10S530/82	US19750586520	19750612	US19750586520 19750612	US3790485 (A) US3821080 (A)
Nuclear isolation medium and procedure for separating cell nuclei	US4668618 (A)	1987-05-26	THORNTHWAITE JERRY T [US]	THORNTHWAITE JERRY T [US]	C12Q1/68 G01N33/50 C12Q1/68 C12Q1/02	C12Q1/6806 G01N33/5005 Y10S435/81 Y10T436/10 Y10T436/107497 Y10T436/108331 Y10T436/25125 Y10T436/25375	US19840574647	19840130	US19840574647 19840130 US19810301599 19810914	US3684377 (A) US3864212 (A) US3883247 (A) US4061537 (A) US4102810 (A) US4286963 (A) US4297238 (A) US4299726 (A) US4303752 (A) US4319882 (A)
Single cell vertical static flow flotation unit cross-reference to related applications	US5080780 (A)	1992-01-14	CANZONERI ANTHONY S [US] BOZE RONALD A [US]	PROCESS DEV COMPANY [US]	B01D17/02 B01D17/035 B03D1/24 C02F1/24 B01D17/035	B01D17/0205 B03D1/028 B03D1/1462 B03D1/1475 B03D1/24 C02F1/24 B03D1/1412 B01D17/0205 B01D17/0214	US19900563323	19900727	US19900563323 19900727 US19880255505 19881011 US19890384833 19890725	US1139024 (A) US1235083 (A) US1312754 (A) US2307154 (A) US2770365 (A) US3271293 (A) US3347784 (A) US3432038 (A) US3433359 (A) US3477581 (A) US4094783 (A) US4331534 (A) US4338192 (A) US4490248 (A) US4563274 (A) US4564457 (A) US4572786 (A) US4627922 (A) US4649281 (A) US4724073 (A) US4782789 (A) US4834872 (A) US4902429 (A) US4986903 (A) US5011597 (A) SU1101305 (A1) GB2079618 (A) GB2162092 (A)
Induced gas liquid coalescer and flotation separator	US5080802 (A)	1992-01-14	CAIRO JR JOHN A [US] YOUNG JOHN A [US]	CAIRO JR JOHN A [US] YOUNG JOHN A [US]	B01D17/02 C02F1/24 B01D17/022 C02F1/24 C02F1/40	B01D17/0205 C02F1/24 Y10S261/75 Y10S210/05 B01D17/0205 B01D17/045	US19900521262	19900509	US19900521262 19900509	US1940762 (A) US2669440 (A) US3542675 (A) US3948767 (A) US3948768 (A) US3956128 (A) US4191651 (A) US4255262 (A) US4277347 (A) US4308136 (A) US4335001 (A) US4428841 (A) US4564457 (A) US4782789 (A) US4834872 (A) US4964733 (A) US4980070 (A) US4981582 (A) US4986903 (A)
Single cell gas flotation separator with filter media	US5516434 (A)	1996-05-14	CAIRO JR JOHN A [US] YOUNG JOHN A [US]	UNICEL INC [US]	B01D24/14 B01D36/00 B03D1/14 C02F1/24 C02F1/00 C02F9/00 B01D36/00 C02F1/24	B01D36/00 B01D24/14 B03D1/028 B03D1/1431 B03D1/1462 B03D1/1475 C02F1/24 B03D1/1468 C02F1/001 B01D2201/208 B01D24/14 B01D24/386 B01D24/405 B01D24/4631 B01D24/4869 B01D24/4884	US19950451145	19950526	US19950451145 19950526	US3433359 (A) US3506125 (A) US3713543 (A) US3905890 (A) US3977970 (A) US4094783 (A) US4162972 (A) US4289628 (A) US4294697 (A) US4377485 (A) US4626345 (A) US4673494 (A) US4800025 (A) US4981582 (A) US5064531 (A) US5080780 (A) US5080802 (A) US5130029 (A) US5156745 (A) US5256299 (A) US5273624 (A) US5320750 (A) DE3412217 (A1) DE4335104 (A1) JPH01242187 (A) GB2263694 (A) SU1381074 (A1) SU1430353 (A1)
High-pressure hydrogen production apparatus	US7846307 (B2); US2006254907 (A1)	2006-11-16	TARUYA KENJI [JP] OKABE MASANORI [JP] NAKAZAWA KOJI [JP]	HONDA MOTOR CO LTD [JP]	C25B9/00	C25B9/18 C25B1/12 Y02E60/366	US20060431212	20060510	JP20050136810 20050510	US7048839 (B2)								JP2001131787 (A) JP2002173788 (A) JP2005097746 (A)
Single cell vertical static flow flotation unit	US5011597 (A)	1991-04-30	CANZONERI ANTHONY S [US] BOZE RONALD A [US]	CANZONERI ANTHONY S [US] BOZE RONALD A [US]	B01D17/02 B01D17/035 B03D1/24 C02F1/24 B01D17/035	B01D17/0205 B03D1/028 B03D1/1462 B03D1/1475 B03D1/24 C02F1/24 B03D1/1412 B01D17/0205 B01D17/0214	US19890384833	19890725	US19890384833 19890725 US19880255505 19881011	US1139024 (A) US1235083 (A) US1312754 (A) US2307154 (A) US2770365 (A) US3271293 (A) US3347784 (A) US3432038 (A) US3433359 (A) US3477581 (A) US4094783 (A) US4331534 (A) US4338192 (A) US4490248 (A) US4563274 (A) US4572786 (A) US4627922 (A) US4649281 (A) US4724073 (A) US4782789 (A) US4834872 (A) SU1101305 (A1) GB2079618 (A) GB2162092 (A)
Apparatus for recovering and recycling animal waste	US4419239 (A)	1983-12-06	FRANKL GERALD P [US]	FRANKL GERALD P	A01C3/00 C05F3/06 B01D23/02	A01C3/00 C05F3/06	US19820368166	19820414	US19820368166 19820414	US996624 (A) US1292237 (A) US1483667 (A) US1535750 (A) US2191743 (A) US3773659 (A) US3873450 (A) US3884811 (A) US3950562 (A) US3971720 (A) US3979296 (A) US3997437 (A) US4066548 (A) US4193733 (A)
Chlorine generator	US6942766 (B2); US2004140200 (A1)	2004-07-22	LEMKE CHRIS ALAN [US]	LEMKE CHRIS ALAN	C02F1/461 C02F1/467 C25B9/08 C25B1/26	C02F1/4674 C02F1/46104 C25B9/08 C02F2201/46115 C02F2201/46125	US20030346405	20030116	US20030346405 20030116	US4713170 (A) US4976842 (A) US5037519 (A) US5545310 (A) US6059942 (A)								US3962065 (A) US4076603 (A) US4097356 (A) US4107022 (A) US4142950 (A) US4250126 (A) US4256552 (A) US4363713 (A) US4484991 (A) US4555323 (A) US4613415 (A) US4683041 (A) US4693806 (A) US4724059 (A) US4772364 (A) US5053114 (A) US5094734 (A) US5133848 (A) US5779874 (A) US6368474 (B1)
Process for the production of a concentrate containing a bee product, a concentrate containing a bee product and its use	US4426397 (A)	1984-01-17	SCHANZE RUDOLF [DE]	SCHANZE RUDOLF [DE]	A23C9/156 A23K1/00 A23K1/08 A23K1/18 A23L1/076 A23L1/08 A23L1/08 A23C9/10 A23L1/30	A23C9/156 A23K1/001 A23K1/008 A23K1/08 A23K1/18 A23L1/076 A23L1/08 Y10S426/81 Y10S426/801 Y10S426/80	US19810329692	19811211	DE19803049380 19801229
Matrix of memory cells fabricated by means of a self-aligned source process, comprising ROM memory cells, and related manufacturing process	US6812531 (B1)	2004-11-02	BALDI LIVIO [IT] GHEZZI PAOLO [IT]	ST MICROELECTRONICS SRL [IT]	G11C16/06 H01L21/8246 H01L27/112 H01L29/76 H01L29/94	H01L27/11246 H01L27/112	US19990303055	19990430	EP19980830282 19980511	US4514894 (A) US5200802 (A) US5736421 (A) US5814853 (A)								US4107719 (A) US4282646 (A) US4357178 (A) US4535532 (A) US4597060 (A) US4792925 (A) US4905062 (A) US5087584 (A) US5103274 (A) US5160986 (A) US5256584 (A) US5296396 (A) US5330924 (A) US5376566 (A) US5378641 (A) US5403764 (A) US5407852 (A) US5426063 (A) US5432749 (A) US5453637 (A) US5459085 (A) US5475250 (A) US5480823 (A) US5482881 (A) US5593907 (A) US5624859 (A) US5670392 (A) US5698879 (A) US57233…
Use of novel stem cell markers for isolation of intestinal stem cells, and use of the intestinal stem cells thus obtained for the preparation of a therapeutical composition	US2004058392 (A1)	2004-03-25	CLEVERS JOHANNES CAROLUS [NL] GOMEZ EDUARD BATLLE [NL] VAN DE WETERING MARCUS LAMBERT [NL] SUILS ELENA SANCHO [NL]	KYLIX B V [NL]	C12N5/074 G01N33/50 A61K35/12 C12Q1/68 C12N5/08 G01N33/53 G01N33/567	C12N5/068 G01N33/5005 A61K35/12	US20020246786	20020917	EP20020078917 20020917
Cell isolation and screening device and method of using same	US7169578 (B2); US2003032071 (A1)	2003-02-13	WANG EVELYN [US] CASAGRANDE ROCCO [US] KENDALE AMAR [US] KIM ENOCH [US] OSTUNI EMANUELE [US] SCHUELLER OLIVIER [US]	WANG EVELYN, CASAGRANDE ROCCO, KENDALE AMAR, KIM ENOCH, OSTUNI EMANUELE, SCHUELLER OLIVIER, SURFACE LOGIX, INC	B01L3/00 C12M1/26 C12N5/00 C12N5/06 G01N33/543 C40B60/14 G01N35/00 G01N33/53	B01L3/5085 G01N33/54326 B01L3/5088 C40B60/14 G01N35/0098 B01J2219/00317 B01J2219/00655 B01J2219/00659 B01J2219/00743 B01L2400/043	US20020206341	20020729	US20020206341 20020729 US20020084063 20020228 US20010334593P 20011203 US20010307843P 20010727	US4729949 (A) US5603351 (A) US6083761 (A)								US4230685 (A) US4408625 (A) US4508625 (A) US4582622 (A) US4591570 (A) US4672040 (A) US4748124 (A) US4777145 (A) US4910148 (A) US4988618 (A) US4992377 (A) US5186827 (A) US5200084 (A) US5202227 (A) US5278063 (A) US5330911 (A) US5395498 (A) US5427663 (A) US5466574 (A) US5476796 (A) US5486457 (A) US5498392 (A) US5498550 (A) US5508164 (A) US5514340 (A) US5567326 (A) US5573942 (A) US5591627 (A) US55938…
Cell isolation and screening device and method of using same	US2003032002 (A1); US7169577 (B2)	2003-02-13	WANG EVELYN [US] CASAGRANDE ROCCO [US] KENDALE AMAR [US] KIM ENOCH [US] OSTUNI EMANUELE [US] SCHUELLER OLIVIER [US]	WANG EVELYN, CASAGRANDE ROCCO, KENDALE AMAR, KIM ENOCH, OSTUNI EMANUELE, SCHUELLER OLIVIER, SURFACE LOGIX, INC	B01L3/00 C12M1/26 C12N5/00 C12N5/06 G01N33/543 C40B60/14 G01N35/00 C12Q1/00 G01N33/567	B01L3/5085 G01N33/54326 B01L3/5088 C12M23/12 C40B60/14 G01N35/0098 B01J2219/00317 B01J2219/00655 B01J2219/00659 B01J2219/00743 B01L2400/043	US20020206340	20020729	US20020206340 20020729 US20020084063 20020228 US20010334593P 20011203 US20010307843P 20010727	US4729949 (A) US5603351 (A) US6083761 (A)								US4230685 (A) US4408625 (A) US4508625 (A) US4582622 (A) US4591570 (A) US4672040 (A) US4748124 (A) US4777145 (A) US4910148 (A) US4988618 (A) US4992377 (A) US5186827 (A) US5200084 (A) US5202227 (A) US5278063 (A) US5330911 (A) US5395498 (A) US5427663 (A) US5466574 (A) US5476796 (A) US5486457 (A) US5498392 (A) US5498550 (A) US5508164 (A) US5514340 (A) US5567326 (A) US5573942 (A) US5591627 (A) US55938…
Fabricated food products from textured protein particles	US4361588 (A)	1982-11-30	HERZ JACK L	NUTRISEARCH CO	A23J3/00 A23J3/22 A23J3/02 A23L1/34	A23J3/225 Y10S426/802	US19800173564	19800730	US19800173564 19800730	US3939284 (A) US4000323 (A) US4029825 (A) US4125630 (A) US4214010 (A) US4218490 (A) US4226890 (A)
Method for recovering and recycling animal waste materials	US4338337 (A)	1982-07-06	FRANKL GERALD P	FRANKL GERALD P	A23K1/00 B03B9/06 B07B1/46 A23K1/00	A23K1/007 B07B1/46 B03B9/061 Y10S426/807	US19800133534	19800324	US19800133534 19800324	US996624 (A) US1292237 (A) US1535750 (A) US2191743 (A) US3773659 (A) US3873450 (A) US3884811 (A) US3950562 (A) US3971720 (A) US3979296 (A) US3997437 (A) US4066548 (A) US4193873 (A)
FAST CONTROLLABLE LASER LYSIS OF CELLS FOR ANALYSIS	WO9945372 (A1)	1999-09-10	ALLBRITTON NANCY L SIMS CHRISTOPHER E BERNS MICHAEL W MEREDITH GAVIN D KRASIEVA TATIANA B TROMBERG BRUCE J	UNIV CALIFORNIA [US]	G01N33/48 C12M1/33 C12N13/00 G01N27/447 G01N33/483 G01N27/26 G01N33/48	C12M47/06 G01N27/44743 G01N27/44721	WO1999US04595	19990303	US19980036706 19980306												XP002919395 XP002919396 XP002919397 XP002919398 XP002919399
MULTIBYTE RANDOM ACCESS MASS STORAGE/MEMORY SYSTEM	WO0019421 (A1)	2000-04-06	ROPE RONALD E PULLAM MARTIN L	SQUARED G INC T [US]	G06F3/06 G11B7/14 G11B17/04 G11B7/00 G11B7/0033 G11B7/007 G11B7/085 G11B7/09 G11B7/125 G11B7/135 G11B7/12	G11B7/1359 G06F3/0601 G11B7/128 G11B7/14 G11B17/0408 G06F2003/0694 G11B7/0033 G11B7/007 G11B7/08505 G11B7/08547 G11B7/0908 G11B2007/0013	WO1998US20248	19980928	WO1998US20248 19980928 US19960589560 19960122											US5138592 (A) US5408453 (A) US5033040 (A) US5235574 (A) US5253245 (A)
Production of biomass and single cell protein from industrial waste oils, oily sludge from ships and other sources of oily wastes	US2005227338 (A1)	2005-10-13	GANTI SATYANARAYANA [US] GANTI DINKAR [US]		A23J1/00 A23K1/00 A23K1/16 A23K1/18 C11B1/10 C11B13/00 C12N1/21 C12P7/64 C12P7/64 C12N1/21	C12P7/64 A23J1/001 A23K1/008 A23K1/1631 A23K1/1813 C11B1/10 C11B13/00	US20050089092	20050324	US20050089092 20050324 US20040556387P 20040325
Cardiac bodies: clusters of spontaneously contracting cells for regenerating cardiac function	US2005214938 (A1)	2005-09-29	GOLD JOSEPH D [US] XU CHUNHUI [US]		C12N5/077 C12N5/08	C12N5/0657 C12N2500/33 C12N2501/33 C12N2506/02 C12N2533/50 C12N2533/90	US20050085899	20050321	US20040556722P 20040326 US20050085899 20050321
Extraction of uranium using electrolytic oxidization and reduction in bath compartments of a single cell	US4341602 (A)	1982-07-27	NENNER THOMAS FORAISON DOMINIQUE	RHONE POULENC IND	B01D11/04 C01G43/00 C22B60/02 C25B1/00 C25B1/00 C01G43/00	C22B60/026 C25B1/00	US19790065504	19790810	FR19780023950 19780817	US2790702 (A) US2843450 (A) US3616276 (A) US3711591 (A) US3737513 (A) US3770612 (A) US3869374 (A) US4021313 (A) US4234393 (A)
Nuclear isolation medium and procedure for separating cell nuclei	US4906561 (A)	1990-03-06	THORNTHWAITE JERRY T [US]	THORNTHWAITE JERRY T [US]	C12Q1/68 G01N33/50 C12Q1/02 C12Q1/68	C12Q1/6806 G01N33/5005 Y10S435/81 Y10T436/10 Y10T436/107497 Y10T436/108331 Y10T436/25375	US19870034981	19870406	US19870034981 19870406 US19810301599 19810914	US3684377 (A) US3864212 (A) US3883247 (A) US4061537 (A) US4102810 (A) US4286963 (A) US4296201 (A) US4297238 (A) US4299726 (A) US4303752 (A) US4319882 (A) US4331759 (A) US4407942 (A)
SINGLE CELL ANALYSIS OF MEMBRANE MOLECULES	WO2004061446 (A1)	2004-07-22	BOONE TRAVIS SINGH SHARAT	ACLARA BIOSCIENCES INC [US]	C12Q1/68 G01N27/447 G01N27/453 G01N33/53 G01N27/447 G01N27/453	G01N27/44726 C12Q1/6823 C12Q1/6823 C12Q2521/301 C12Q2527/113 C12Q2537/162	WO2003US35298	20031105	US20020434524P 20021218											US6335201 (B1) US6613211 (B1)	XP002977868
CELL ISOLATION AND SCREENING DEVICE AND METHOD OF USING SAME	WO03011451 (A1)	2003-02-13	WANG EVELYN [US] KIM ENOCH [US] CAMPBELL STEWART [US] KIRK GREG L [US] CASAGRANDE ROCCO [US]	SURFACE LOGIX INC [US] WANG EVELYN [US] KIM ENOCH [US] CAMPBELL STEWART [US] KIRK GREG L [US] CASAGRANDE ROCCO [US]	B01L3/00 C12M1/26 C12N5/00 C12N5/06 G01N33/543 C40B60/14 G01N35/00 B01J19/00 B01L3/00 C12M1/34 G01N15/14 G01N33/53	B01L3/5085 C12M33/00 G01N33/54326 B01L3/5088 C40B60/14 G01N35/0098 B01J2219/00317 B01J2219/00655 B01J2219/00659 B01J2219/00743 B01L2400/043	WO2002US24068	20020729	US20010307843P 20010727 US20010334593P 20011203 US20020084063 20020228											WO0017624 (A2) US6083761 (A) US5603351 (A) US6167910 (B1)	XP002957278
METHOD OF AMPLIFYING TARGET GENE CONTAINED IN BIOLOGICAL SAMPLE	WO2006054492 (A1)	2006-05-26	OZAWA TATSUHIKO [JP]	TOYAMA NEW INDUSTRY ORGANIZATI [JP] OZAWA TATSUHIKO [JP]	C12N15/10	C12Q1/6855	WO2005JP20718	20051111	JP20040336090 20041119		XP004020876 XP002998064 XP002998065 XP000604678 XP004218461 XP002998066 XP001121212
METHOD FOR OBTAINING CONJUGATED PROTEIN HAVING LIGAND AFFINITY, METHOD FOR ANTIBODY SCREENING, KIT FOR ANTIBODY SCREENING, METHOD OF MEDICINAL TREATMENT, ANTIBODY MEDICINE, IMMUNOLOGICALLY NONREACTIVE ANTIBODY MEDICINE AND METHOD OF ADMINISTRATION	JP4686682 (B2); JP2006158203 (A)	2006-06-22	NAKANO HIDEO JAN SHUU PIN	UNIV NAGOYA	C12P21/00 A61K39/395 A61P31/00 A61P35/00 A61P37/00 A61P43/00 C12N15/09 C12P21/08 G01N33/15 G01N33/50 G01N33/53 G01N33/68		JP20040349309	20041202	JP20040349309 20041202	WO02059601 (A1) JP2004173681 (A)
ICE CREAM-TYPE, SINGLE-CELL FOOD PRODUCT AND ITS MANUFACTURING PROCESS	JP2004000025 (A)	2004-01-08	UEMURA YUYA TSUKIURA HIDEHIRO	K NET COM KK IT GEM KK	A23G9/32 A23G9/44 A23G9/52 A23L1/212 C12G3/04 A23L1/212 A23G9/02 C12G3/04		JP20020157172	20020530	JP20020157172 20020530
NONAQUEOUS ELECTROLYTE SECONDARY CELL	JP2001351691 (A)	2001-12-21	NOMA KATSUYA	GS MELCOTEC CO LTD	H01M2/06 H01M2/26 H01M10/05 H01M10/052 H01M10/058 H01M10/40 H01M2/06 H01M2/26	Y02E60/122	JP20000173703	20000609	JP20000173703 20000609
ATM CELL DEMULTIPLEX SYSTEM AND ATM CELL DEMULTIPLEX METHOD	JP2000134223 (A)	2000-05-12	MATSUBARA TATSUO	NIPPON ELECTRIC ENG	H04Q3/00 H04L12/28 H04L12/28 H04Q3/00		JP19980307023	19981028	JP19980307023 19981028
DRAM HAVING BIPOLAR TYPE CELL STRUCTURE	JPH05102413 (A)	1993-04-23	SHINOHARA MASATO	CANON KK	H01L27/10 G11C11/401 H01L27/10		JP19910292254	19911011	JP19910292254 19911011
BREEDING OF BASIDIOMYCETE HAVING HIGH LIGNIN-DECOMPOSITION ACTIVITY BY REGENERATED PROTOPLAST PROCESS	JPH0690740 (A)	1994-04-05	KAKEZAWA MASAAKI MIURA MASAHIKO NISHIDA TOMOAKI TAKAHARA YOSHIMASA	KOBE STEEL LTD	C12N1/14 C12R1/645 C12N1/14 C12N1/14 C12R1/645		JP19910261290	19910913	JP19910261290 19910913
GAS SEPARATION MEMBRANE MODULE	JPS6365931 (A)	1988-03-24	HATANAKA SHIGEKI SUGIMOTO TAKANORI KOBAYASHI TAKAKI RYUZAKI SHIGERU	MATSUSHITA ELECTRIC IND CO LTD	B01D53/22 B01D53/22		JP19860209859	19860905	JP19860209859 19860905
CELL TRANSFER MECHANISM AND CELL FUSION APPARATUS	JPH0731457 (A)	1995-02-03	SUZUKI HIROYUKI YASUNAKA TOSHIO	TOKIMEC INC	C12M1/00 C12M1/42 C12M1/00 C12M1/42	C12M35/02 C12M47/04	JP19930183632	19930726	JP19930183632 19930726
HYPOTENSOR AND CEREBRAL PARALYSIS PREVENTIVE CONTAINING HETEROTROPHIC CHLORELLA	JPH0475206 (B2); JPS6058924 (A)	1985-04-05	OOGAKI MASAHIRO MURAKAMI TETSUO IIZUKA YOSHITOMI	OSAKA SEIKEN KK	A61K36/05 A61K36/02 A61P9/10 A61P9/12 A61K35/80		JP19830167375	19830910	JP19830167375 19830910	JPS5538336 (A) JPS55164629 (A) JPS5829074 (A)
DEVICE FOR SUPPLYING CELL FOR MANUFACTURING GAME MACHINE	JPH09308729 (A); JP3640465 (B2)	1997-12-02	TAKAHASHI HATSUMI	HEIWA CORP	A63F7/02 A63F7/02		JP19960130239	19960524	JP19960130239 19960524
IMPROVED BATTERY STRUCTURE	JPS6069 (A)	1985-01-05	MURAKAMI MICHIKAZU MATSUBARA HIRONAGA SHIGEMATSU TOSHIO KONDOU MAMORU	SUMITOMO ELECTRIC INDUSTRIES	H01M6/42 H01M8/24 H01M10/04 H01M8/18	H01M8/246 H01M10/04 H01M6/42 Y02E60/50	JP19830107290	19830615	JP19830107290 19830615
Array of single-stranded DNA immobilised on a solid support	GB2318791 (B); GB2318791 (A)	1998-05-06	CHARLES ANDREW DAVID	ZENECA LTD [GB]	G01N37/00 C12N15/09 C12Q1/68 G01N33/53 C12Q1/68 C07H21/04	C12Q1/6837	GB19970022594	19971028	GB19960022665 19961031	WO9535505 (A1) WO9535505 (A1)
METHOD OF CULTIVATING SINGLE-CELL FOOD PROTEINS BY A FERMENTATION PROCESS	GB1491263 (A)	1977-11-09		MULLER H	A23L1/28 A01N61/00 A01P21/00 A23J1/00 A23K1/06 C02F3/02 C02F9/00 C05F5/00 C12N1/00 C07G7/00	A23J1/008 C02F3/02 C02F9/00 C12N1/005 Y02E50/343	GB19750026424	19750620	CH19740008653 19740621
Improvements in means for producing light of variable colour for use for example in colour television receiving apparatus	GB620032 (A)	1949-03-18		SCOPHONY LTD	H04N1/50	H04N1/50	GB19450020504	19450809	USX620032 19440826
PROCESS FOR RECOVERING SINGLE CELL MICRO-ORGANISMS FROM FERMENTATION BROTH	GB1494742 (A)	1977-12-14		BRITISH PETROLEUM CO	C12N1/02 C12N1/26 C12C11/24 C12B1/26 C12D13/06	C12N1/26 C12N1/02	GB19740012101	19740319	GB19740012101 19740319
Improvements in or relating to apparatus for use in water purification treatment or like processes	GB854091 (A)	1960-11-16		ALBERT WHITELEY BRISTOW	C02F1/52	B01D21/245 C02F1/5281	GB19580004500	19580211	GB19580004500 19580211
A method to grow "in vitro" til cells.	EP0611263 (A2); EP0611263 (A3)	1994-08-17	MORETTA LORENZO [IT] MELIOLI GIOVANNI [IT]	CELLIFE BIOTECNOLOGIE [IT]	C12N5/0783 C12N5/06	C12N5/0636 C12N2501/23 C12N2501/59	EP19940830043	19940207	IT1993RM00073 19930210	EP0415666 (A1) EP0362755 (A2) WO9104317 (A1)
Device for purifying blood, useful for the treatment or prevention of e.g. allergy or autoimmune disease, comprises labeling separated cellular and plasma fractions with specific markers, followed by recombination of the purified components	DE10216744 (A1)	2003-06-18	FOSS PIERRE [DE]	FOSS PIERRE [DE]	A61M1/36 A61M1/34	A61M1/36 A61M1/3618 A61M1/362	DE2002116744	20020416	DE2002116744 20020416 DE2001160583 20011207 DE2001164443 20011229
Device for automatically testing single cell dielectric spectrum based on composite dielectrophoresis	CN201075104 (Y)	2008-06-18	ZHONGHUA NI [CN] SHUCUN ZHU [CN] HONG YI [CN] CHUNFENG SONG [CN]	UNIV SOUTHEAST [CN]	G01N33/48 A61B5/00 A61B10/00 C12Q1/02		CN2007238580U	20070713	CN2007238580U 20070713
Method for extracting virus genome RNA from animal tissue	CN101220072 (A)	2008-07-16	BAOHUA ZHAO [CN] JIE SONG [CN] WENJUAN HUANG [CN]	UNIV HEBEI NORMAL [CN]	C07H21/02 C07H1/08		CN20071185356	20071210	CN20071185356 20071210
Immunological magnetic bead sorting process for eliminating embryonic stem cell from differentiated system	CN100587063 (C); CN1932008 (A)	2007-03-21	GUAN YUNQIAN ZHU [CN]	XUANWU HOSPITAL CAPITAL MEDICA [CN]	C12N5/06		CN20061113612	20061009	CN20061113612 20061009
Lymphocyte separation liquid and method of separating spleen lymphocyte	CN101012449 (A); CN101012449 (B)	2007-08-08	ZHU YIXIN [CN]	SHENZHEN DAKEWE BIOTECHNOLOGY [CN]	C12N5/06		CN2006163555	20061109	CN2006163555 20061109
High-pass cell separation device and use method therefor	CN1962845 (A)	2007-05-16	SHEN BINGQIAN YANG [CN]	SHEN BINGQIAN [CN]	C12M1/00		CN20051110303	20051111	CN20051110303 20051111
Micro-flow controlling chip for analyzing single cell algae flow	CN1712926 (A)	2005-12-28	WANG XIULIN SU [CN]	UNIV CHINA OCEAN [CN]	G01N15/00 G01N15/00		CN2005143854	20050619	CN2005143854 20050619
Separation preserving device for sampling cell	CN2697629 (Y)	2005-05-04	MAO RONGJUN [CN]	MAO RONGJUN [CN]	G01N1/38 G01N1/38		CN2004243364U	20040305	CN2004243364U 20040305
Asparagus protoplast separation and purification and method for regenerating to plant	CN1754426 (A); CN100352341 (C)	2006-04-05	WANG GUANGCE YOU [CN]	OCEAN INST OF THE CHINESE ACAD [CN]	A01H4/00		CN2004150542	20040930	CN2004150542 20040930
One-dimensional biological chip and application in gene, protein expression analysis	CN1635146 (A); CN1286987 (C)	2005-07-06	WANG KEMIN [CN] ZHOU LEIJI [CN] TAN WEIHONG [CN]	UNIV HUNAN [CN]	C12Q1/68 G01N33/68 C12Q1/68 G01N33/68		CN2004146790	20040923	CN2004146790 20040923
Cell inclusions analysis method based on microfluid chip	CN1734265 (A)	2006-02-15	LIN BINGCHENG YU [CN]	DALIAN CHEMICAL PHYSICS INST [CN]	G01N33/483 G01N21/17		CN2004121600	20040803	CN2004121600 20040803
Placenta source filling dry cell and production thereof	CN1746297 (A)	2006-03-15	WANG CHANGYONG GUO [CN]	BASIC MEDICINE INST MILITARY M [CN]	C12N5/08 A61K35/12 A61K48/00 C12N5/06		CN2004109534	20040909	CN2004109534 20040909
Culture of single cell green alga and food-making technology thereof	CN1111282 (A)	1995-11-08	DEYUAN XIE [CN]	TAIWAN GREEN ALGA INDUSTRY CO [CN]	A23L1/00 C12N1/12 C12N1/12 A23L1/00		CN1994104965	19940503	CN1994104965 19940503
Method of separating thallus from glutamic acid fermented liquor	CN1073718 (A)	1993-06-30	XINGCHENG XUE [CN]	NANTONG INST OF AQUATIC SCIENC [CN]	B01D21/01 C12N1/02 C12P13/14 C12P13/14 B01D21/01 C12N1/02		CN1991108274	19911221	CN1991108274 19911221
TECHNIQUE OF FISH CELL CLONE CULTURE	CN85102491 (A)	1986-09-24	DENG CHUXIA, YANG XINGQI, CHEN HONGXI	HYDROGENESIS ORGANISM INST., CHINESE ACADEMY OF SCIENCES	A01K61/00 A01K61/00		CN1985102491	19850401	CN1985102491 19850401
Analysis method for micro flow control chip unicell	CN1287145 (C); CN1570616 (A)	2005-01-26	YIN XUEFENG [CN] GAO JIAN [CN] FANG ZHAOLUN [CN]	UNIV ZHEJIANG [CN]	C12Q1/68 G01N27/26 G01N27/416 G01N33/68 G01N35/00 G01N27/26 C12Q1/68 G01N27/416 G01N33/68 G01N35/00		CN2003141657	20030714	CN2003141657 20030714
Gas-phase double-dynamic single-pot solid-state fermentation apparatus	CN2522424 (Y)	2002-11-27	LI HONGZHANG [CN] LI ZUOHU [CN]	COURSE ENGINEERING INST CHINES [CN]	C12M1/00 C12M1/00		CN2002201135U	20020122	CN2002201135U 20020122
Vibration separator for biological tissue monoplast	CN2477644 (Y)	2002-02-20	XU TIANLE [CN] WU LONGJUN [CN] KONG LINGFANG [CN]	UNIV CHINA SCIENCE & TECH [CN]	C12M1/00 C12M3/00 C12M1/00 C12M3/00	C12M47/04	CN2001237627U	20010427	CN2001237627U 20010427
Production method of cell containing resveratrol	CN1103372 (C); CN1292415 (A)	2001-04-25	WEI YAHUI [CN]	WEI YAHUI [CN]	C12N5/04 C12N5/04		CN2000113914	20000830	CN2000113914 20000830
Plant hydrolysate purification for use as fermentation substrate	CH606430 (A5)	1978-10-31	MUELLER FELIX DR GAYLER RUDOLF DR	PROCESS ENGINEERING CO	C12N1/22 C12D13/06	C12N1/22	CH19760014129	19761108	CH19760014129 19761108
SEPARATION PROCESS AND APPARATUS	CA1145268 (A1)	1983-04-26	SHIPLEY DAVID G	ICI LTD	B01D19/00 C02F3/22 C12M1/04 B01D19/00	C02F3/226 B01D19/0042 C12M27/20 C12M29/20	CA19800347161	19800306	GB19790008358 19790309
Method for isolating neural cells with tenascin-R connections	EP2168979 (A1)	2010-03-31	PESHEVA PENKA PROF DR [DE] PROBSTMEIER RAINER DR [DE]	UNIV BONN [DE]	C07K14/435	C07K14/78 C07K2319/00 C07K2319/21	EP20080164921	20080923	EP20080164921 20080923	WO2006067094 (A1) WO2004052922 (A2)	XP002378375 XP002541748 XP002541749 XP002378376							EP0759987 (A1) US5635360 (A) US5681931 (A) US5591583 (A) WO2006067094 (A1)
Scheduling method for wireless multihop relay communication system and system thereof	EP1940049 (A1); EP1940049 (B1)	2008-07-02	LIN SHIANG-JIUN [TW] FU I-KANG [TW] PAI CHENG-KANG [TW] SHEEN WEN-HO [TW]	IND TECH RES INST [TW]	H04B7/26	H04B7/2606 H04B7/2656	EP20060127342	20061229	EP20060127342 20061229	WO03058984 (A2) EP1677443 (A1) WO2005067173 (A1)	XP010754131

## Sheet: 25 selected patents
Title	Publication number	Publication date
Methods for multiplex analytical measurements in single cells of solid tissues	AU2013315409 (A1)	2015-04-02
Single-cell isolation screen adapted with pipettor tip	CN104195036 (A)	2014-12-10
AN INTEGRATED MICROFLUIDIC DEVICE FOR SINGLE-CELL ISOLATION, CELL LYSIS AND NUCLEIC ACID EXTRACTION	CA2817775 (A1)	2014-11-29
SYSTEM AND METHOD FOR CAPTURING AND ANALYZING CELLS	US2014349867 (A1)	2014-11-27
Single-cell automatic analysis device based on dual-optical-path micro-fluidic chip	CN203929785 (U)	2014-11-05
Microfluidic devices and methods for cell sorting, cell culture and cells based diagnostics and therapeutics	US2014248621 (A1)	2014-09-04
HIGH-THROUGHPUT SINGLE-CELL IMAGING, SORTING, AND ISOLATION	US8934700 (B2); US2014247971 (A1)	2014-09-04
Automatic single cell analysis method based on microfluidic system	CN103926190 (A)	2014-07-16
APPARATUS FOR SINGLE CELL SEPARATION AND POSITION FIXING	US2013129578 (A1); US8475730 (B2)	2013-05-23
METHOD AND APPARATUS FOR SINGLE CELL ISOLATION AND ANALYSIS	US2012315639 (A1)	2012-12-13
Apparatus for Magnetic Separation of Cells	US2012045828 (A1)	2012-02-23
Method and apparatus for the discretization and manipulation of sample volumes	CN102187216 (A)	2011-09-14
PLATE FOR SEPARATING SINGLE CELL	JP2011152108 (A); JP5622189 (B2)	2011-08-11
ARRAY APPARATUS FOR SEPARATION OF SINGLE CELL	KR20110037345 (A); KR101252829 (B1)	2011-04-13
Device and method for continuously analyzing single-cell contents by miniflow control chip at high speed	CN101923053 (A); CN101923053 (B)	2010-12-22
Complete set of equipment for single cell gel electrophoresis test	CN201662556 (U)	2010-12-01
Single Cell Analysis of Membrane Molecules	US2009173631 (A1)	2009-07-09
Single-cell inclusion analytical method based on micro-fluidic chip	CN101393124 (A)	2009-03-25
Analytical system based on porous material for highly parallel single cell detection	US2008020453 (A1)	2008-01-24
Single cell isolation apparatus and method of use	US6538810 (B1)	2003-03-25
CELL ISOLATION AND SCREENING DEVICE AND METHOD OF USING SAME	WO03011451 (A1)	2003-02-13
CELL TRANSFER MECHANISM AND CELL FUSION APPARATUS	JPH0731457 (A)	1995-02-03
Device for automatically testing single cell dielectric spectrum based on composite dielectrophoresis	CN201075104 (Y)	2008-06-18
High-pass cell separation device and use method therefor	CN1962845 (A)	2007-05-16
Cell inclusions analysis method based on microfluid chip	CN1734265 (A)	2006-02-15
